# Supplementary material for: Thalamocortical control of cell-type specificity drives circuits for processing whisker-related information in mouse barrel cortex
Source: PubMed Central journal article supplement (PMC10539368; doi:10.1038/s41467-023-41749-x), 2023-09-28
Supplement: 41467_2023_41749_MOESM3_ESM.pdf [file 41467_2023_41749_MOESM3_ESM.pdf]

## **Description of Additional Supplementary Files**

File name: Supplementary Data 1

Description: Summary of genes used for L4 clustering in barrel cortex.

File name: Supplementary Data 2

Description: Summary of differential gene expression analyses using transcriptomics data.

File name: Supplementary Data 3

Description: List of DNA constructs, sequences, reagents, and resources.
